# Supplementary material for: Ultra-compact and high-performance suspended aluminum scandium nitride Lamb wave humidity sensor with a graphene oxide layer
Source: Royal Society of Chemistry journal article supplement (doi:10.1039/d3nr05684h), 2024-01-01
Supplement: d3nr05684h1.pdf [file d3nr05684h1.pdf]

# Ultra-Compact and High-Performance Suspended Aluminum Scandium Nitride Lamb Wave Humidity Sensor with Graphene Oxide Layer

## Supplementary Information

Zhifang Luo<sup>a,b,c,d,e</sup>, Dongxiao Li<sup>d,e</sup>, Xianhao Le<sup>d,e</sup>, Tianyi He<sup>d,e</sup>, Shuai Shao<sup>a,b,c</sup>,  
Qiaoya Lv<sup>d,e</sup>, Zhaojun Liu<sup>d,e</sup>, Chengkuo Lee<sup>\*d,e</sup>, and Tao Wu<sup>\*a,b,c</sup>

<sup>a</sup> School of Information Science and Technology, Shanghai Engineering Research Center of Energy Efficient and Custom AI IC, ShanghaiTech University, CHINA

<sup>b</sup> Shanghai Institute of Microsystem and Information Technology, Chinese Academy of Sciences, CHINA

<sup>c</sup> University of Chinese Academy of Sciences, CHINA

<sup>d</sup> Department of Electrical & Computer Engineering, National University of Singapore, SINGAPORE

<sup>e</sup> Center for Intelligent Sensors and MEMS, National University of Singapore, SINGAPORE

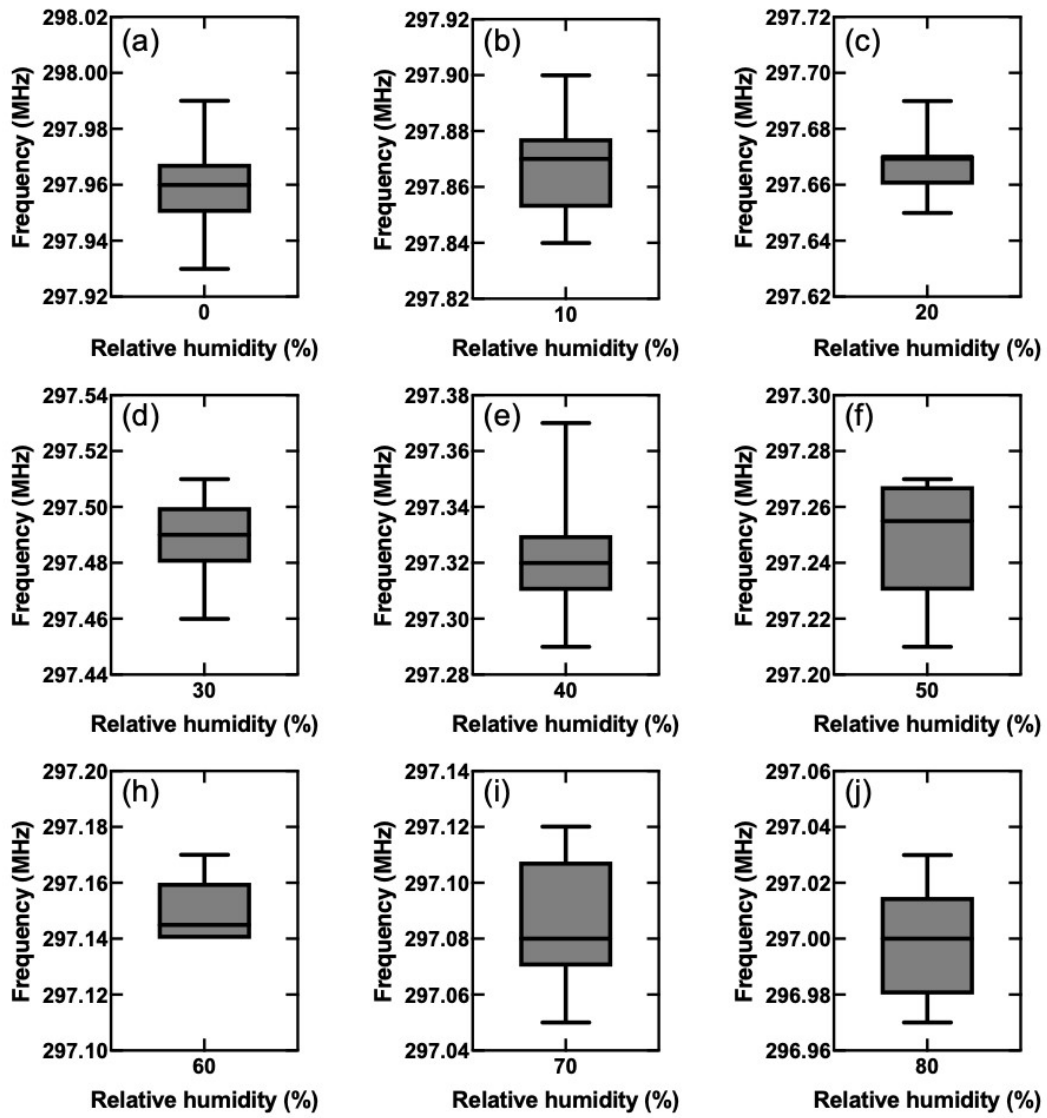

Figure S1: (a)-(i) Frequency response of the sensors versus RH.

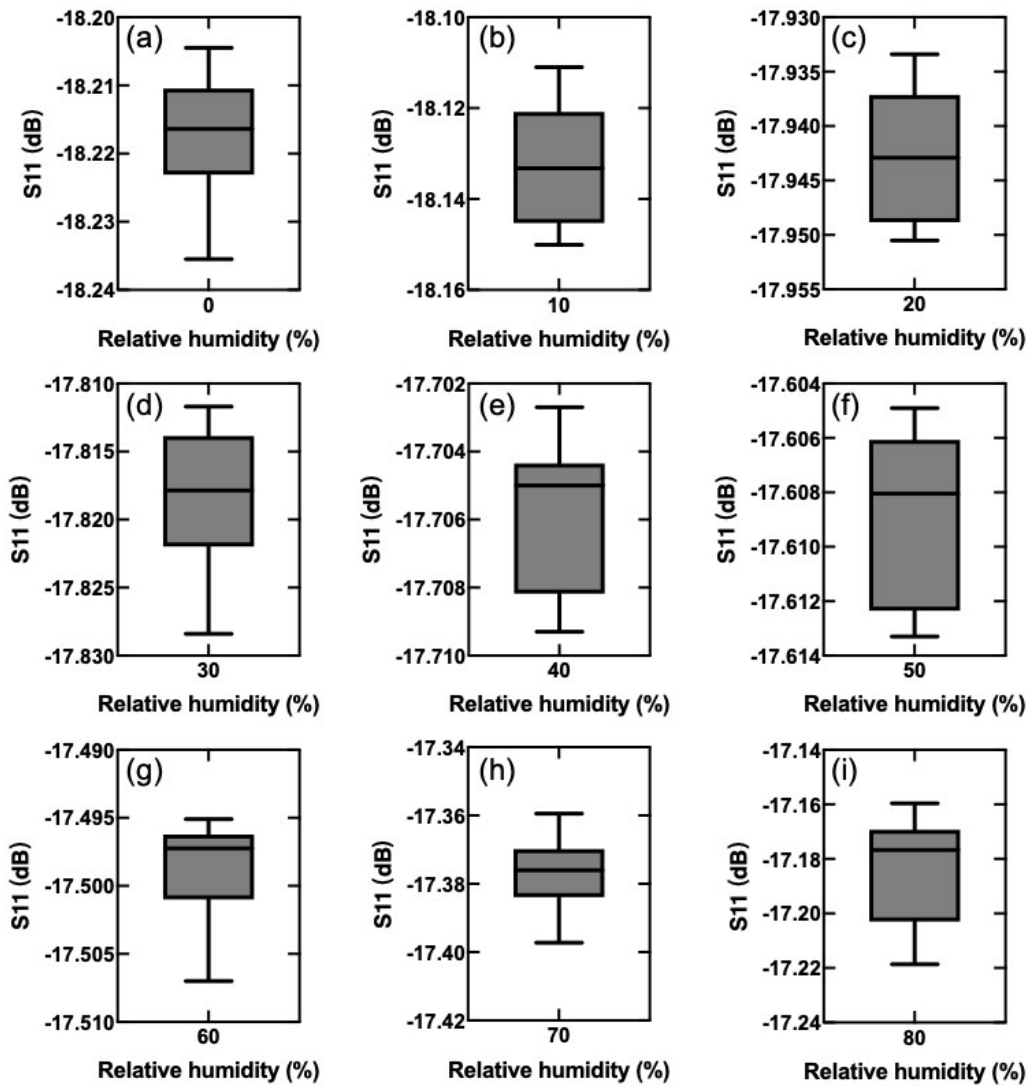

Figure S2: (a)-(i) S11 response of the sensors versus RH.

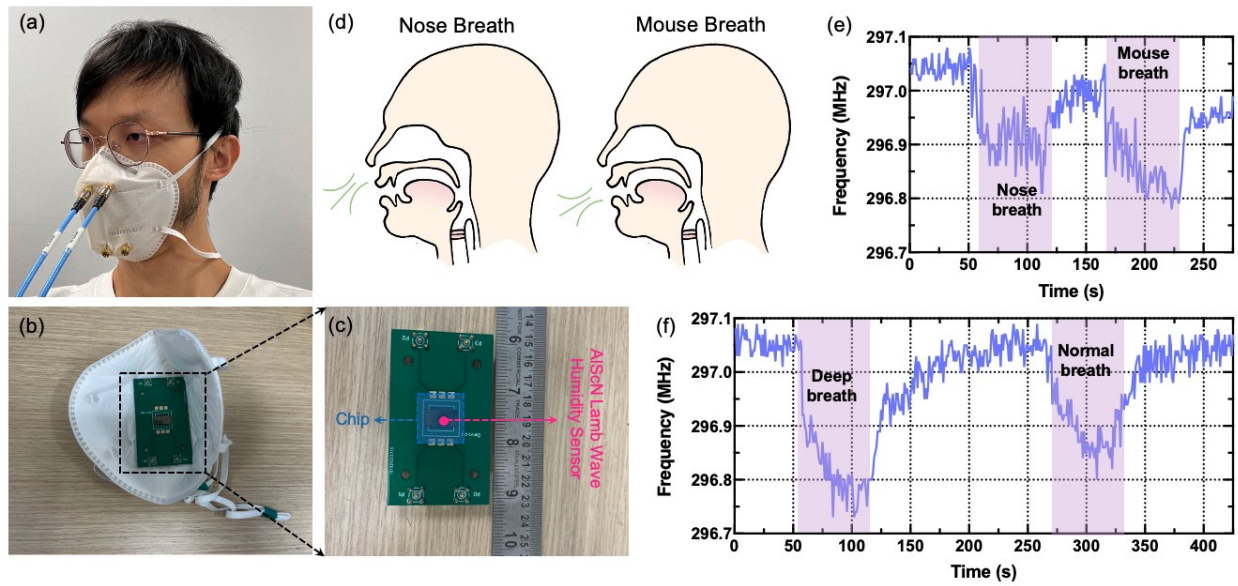

Figure S3: Applications of AlScN Lamb Wave humidity sensor. (a)-(c) Images of test illustration of human respiratory monitoring system and details of sensing mask. (d) Schematic of different breathing ways. Response of the sensor to (e) mouse/nose breath, and (f) normal/deep breath.
